# Supplementary material for: Hidden Genetic Variation in LCA9‐Associated Congenital Blindness Explained by 5′UTR Mutations and Copy‐Number Variations of NMNAT1
Source: PubMed Central journal article supplement — Hum Mutat. 2015 Oct 1;36(12):1188–96. doi: 10.1002/humu.22899 (PMC5054839; doi:10.1002/humu.22899), 2015-10-01
Supplement: HUMU-36-1188-s001.pdf [file HUMU-36-1188-s001.pdf]

## Supporting Information

**Supp. Figure S1. UCSC Genome Browser overview of IBD regions identified in F1**

**Supp. Figure S2. Massively parallel sequencing reads and splice site predictions for c.-70A>T**

**Supp. Figure S3. Segregation analysis of c.-70A>T and c.-69C>T on gDNA and cDNA level in F1 and F2**

**Supp. Figure S4. *LZIC* expression analysis in F1**

**Supp. Figure S5. Secondary structure prediction for the wild type and mutated *NMNAT1* 5'UTR sequences**

**Supp. Figure S6. Identification of a heterozygous *NMNAT1* deletion in F3 and F4**

**Supp. Table S1. Homozygous regions >3 Mb and common between 2 affected siblings of F1**

**Supp. Table S2. Overview of all *NMNAT1* variants identified in the proband of F1**

**Supp. Table S3. *NMNAT1* coding mutations identified in this study**

**Supp. Table S4. *In silico* evaluation of the *NMNAT1* 5'UTR variants**

**Supp. Table S5. G-quadruplexes predictions for the *NMNAT1* 5'UTR mutations**

**Supp. Table S6. Clinical findings of the probands of F3 and F4**

**Supp. Table S7. Bioinformatic analysis of the *NMNAT1* deletion breakpoints**

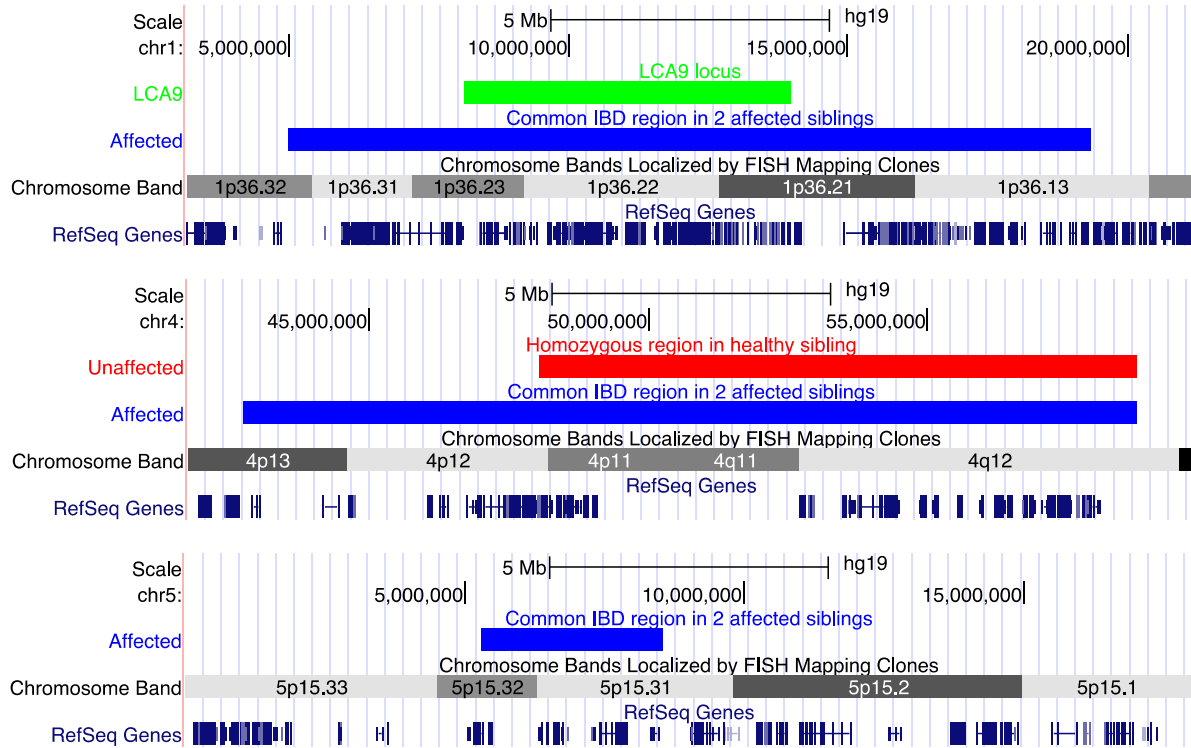

**Supp. Figure S1.** UCSC Genome Browser overview of IBD regions identified in F1. Genome-wide identity-by-descent (IBD) mapping identified three regions larger than 3Mb that were common between two affected siblings of F1 (blue bars) and (partially) absent in the healthy sibling (red bar). The region on chromosome 1 harbors the LCA9 locus (green bar).

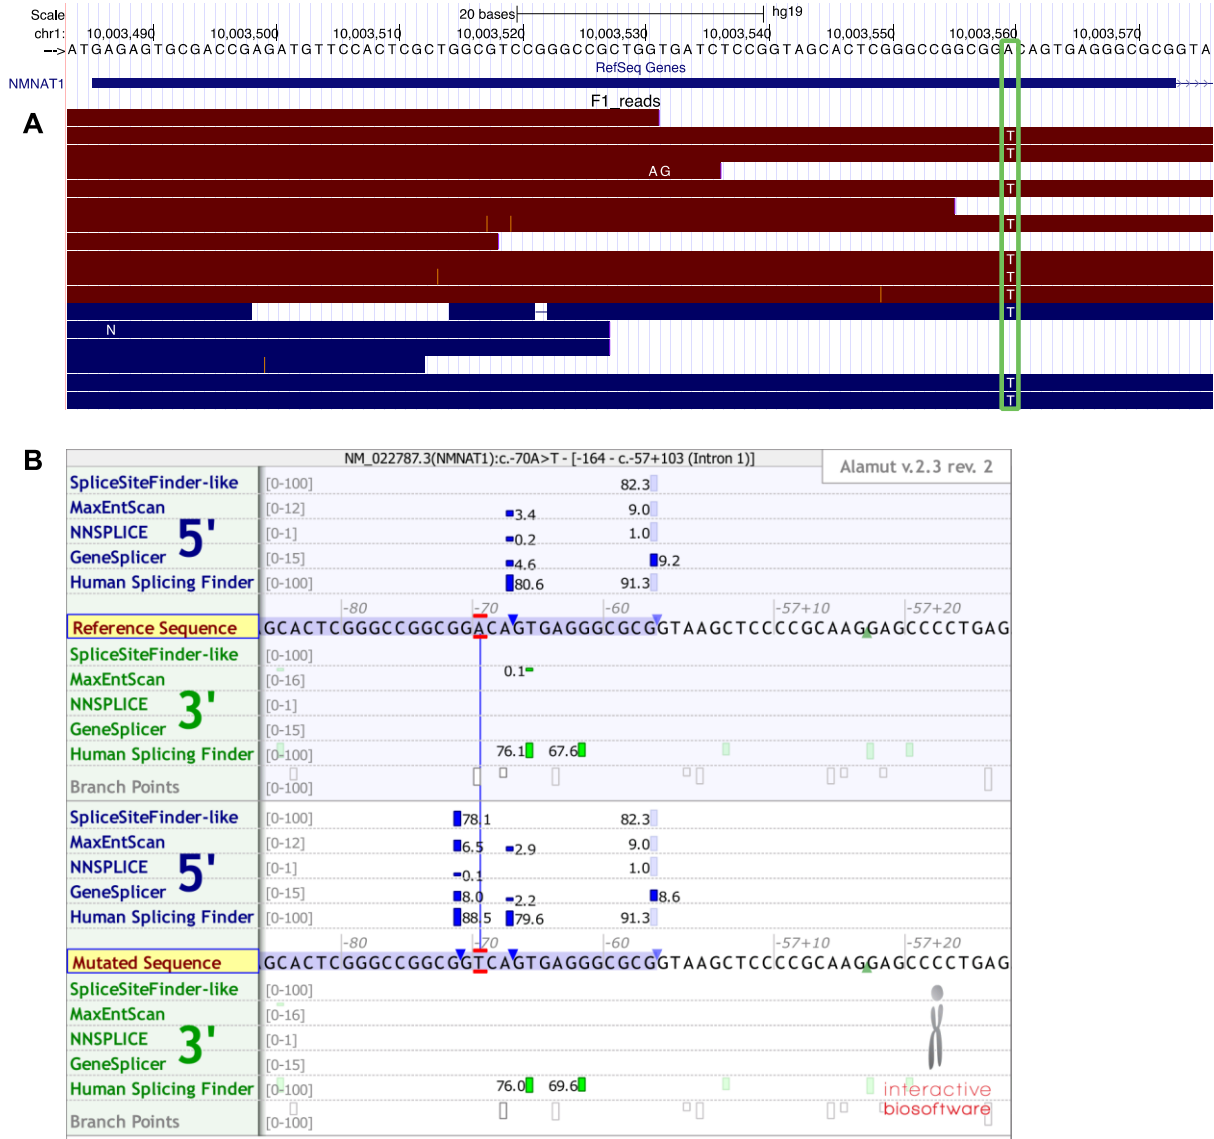

**Supp. Figure S2.** Massively parallel sequencing reads and splice site predictions for c.-70A>T. **A)** UCSC Genome Browser view of the sequencing reads observed in the proband of F1 covering exon 1 of the *NMNAT1* gene. The homozygous c.-70A>T mutation is indicated with a green box. **B)** Splice site predictions of the Alamut interpretation software (v2.3 – default settings used), predicting the introduction of a novel donor splice site for c.-70A>T (indicated with red bars). This potential new donor splice site is still weaker than the canonical donor splice site of which the strength remains unchanged according to 4/5 prediction programs.

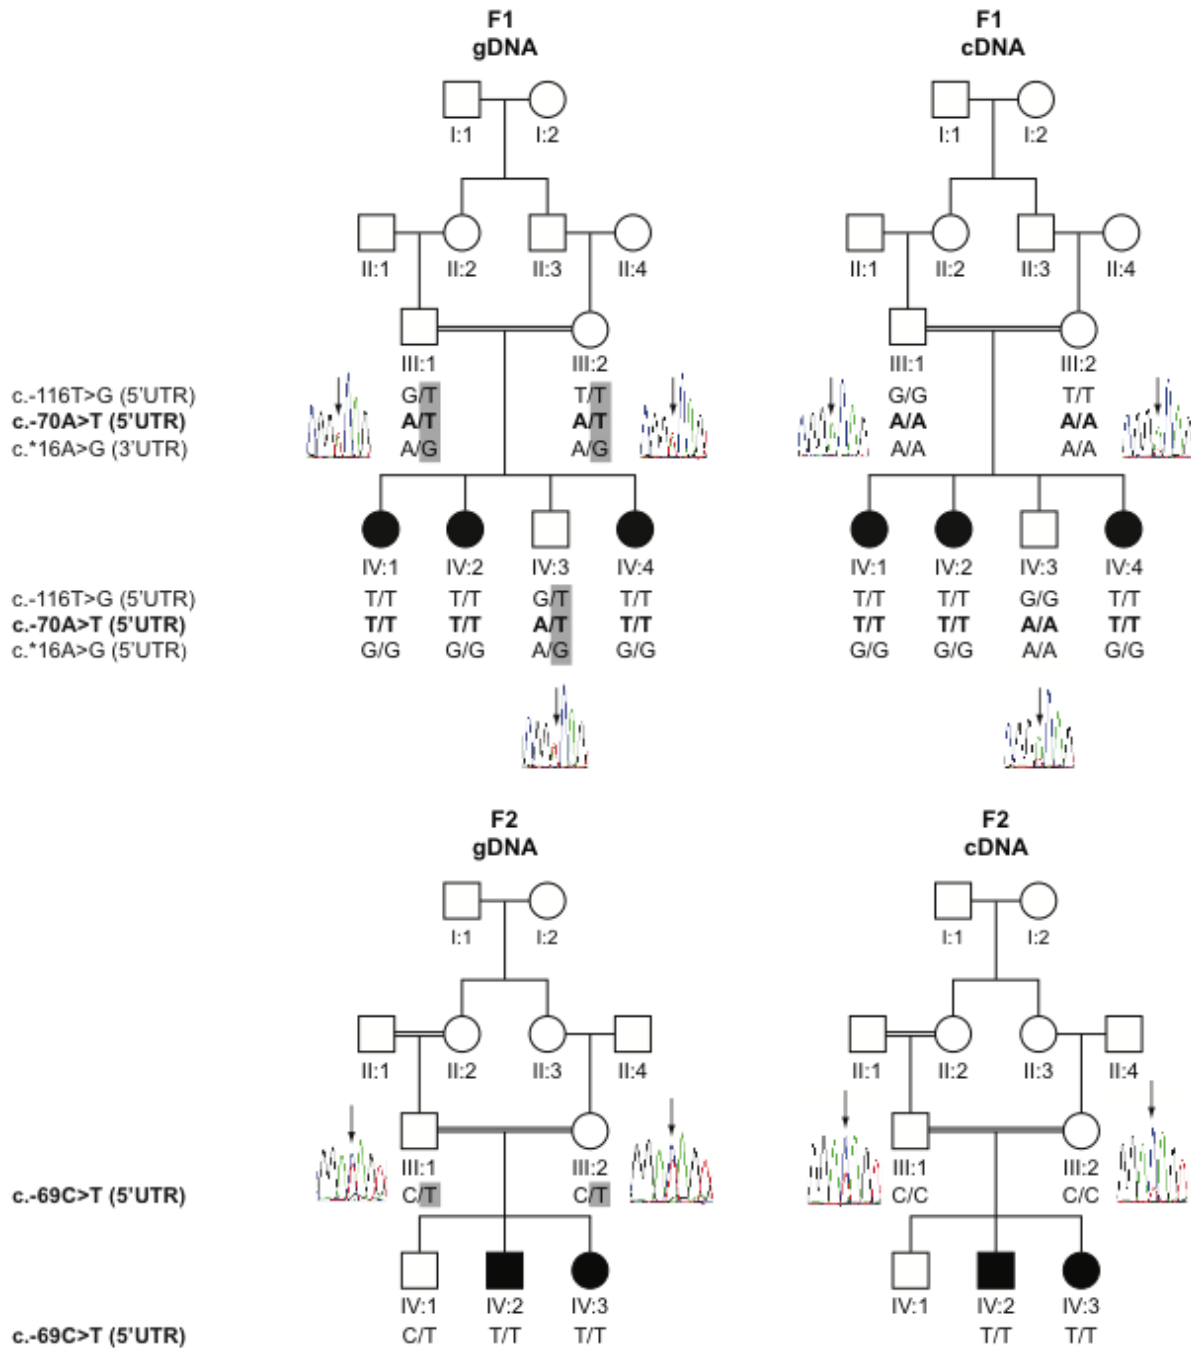

**Supp. Figure S3.** Segregation analysis of c.-70A>T and c.-69C>T on gDNA and cDNA level in F1 and F2. gDNA and cDNA sequencing in both families showed allele-specific expression at the cDNA level. The 5'UTR mutations and a flanking 5'UTR and 3'UTR SNP are represented at the left. The disease haplotype or allele is highlighted in grey. Haplotype analysis of three *NMNAT1* variants found at the gDNA level displayed allele-specific expression at the cDNA level in the parents and the healthy sib of F1. This result was obtained in cells treated with (shown here) and without puromycin (used to block nonsense-mediated decay), suggesting that the genetic defect has an effect prior to translation. For F2, only untreated lymphocyte cultures

were available. As in F1, cDNA sequencing showed allele-specific expression in both parents. In both families, superposition of low sequence traces could be seen that represent residual mutant mRNA.

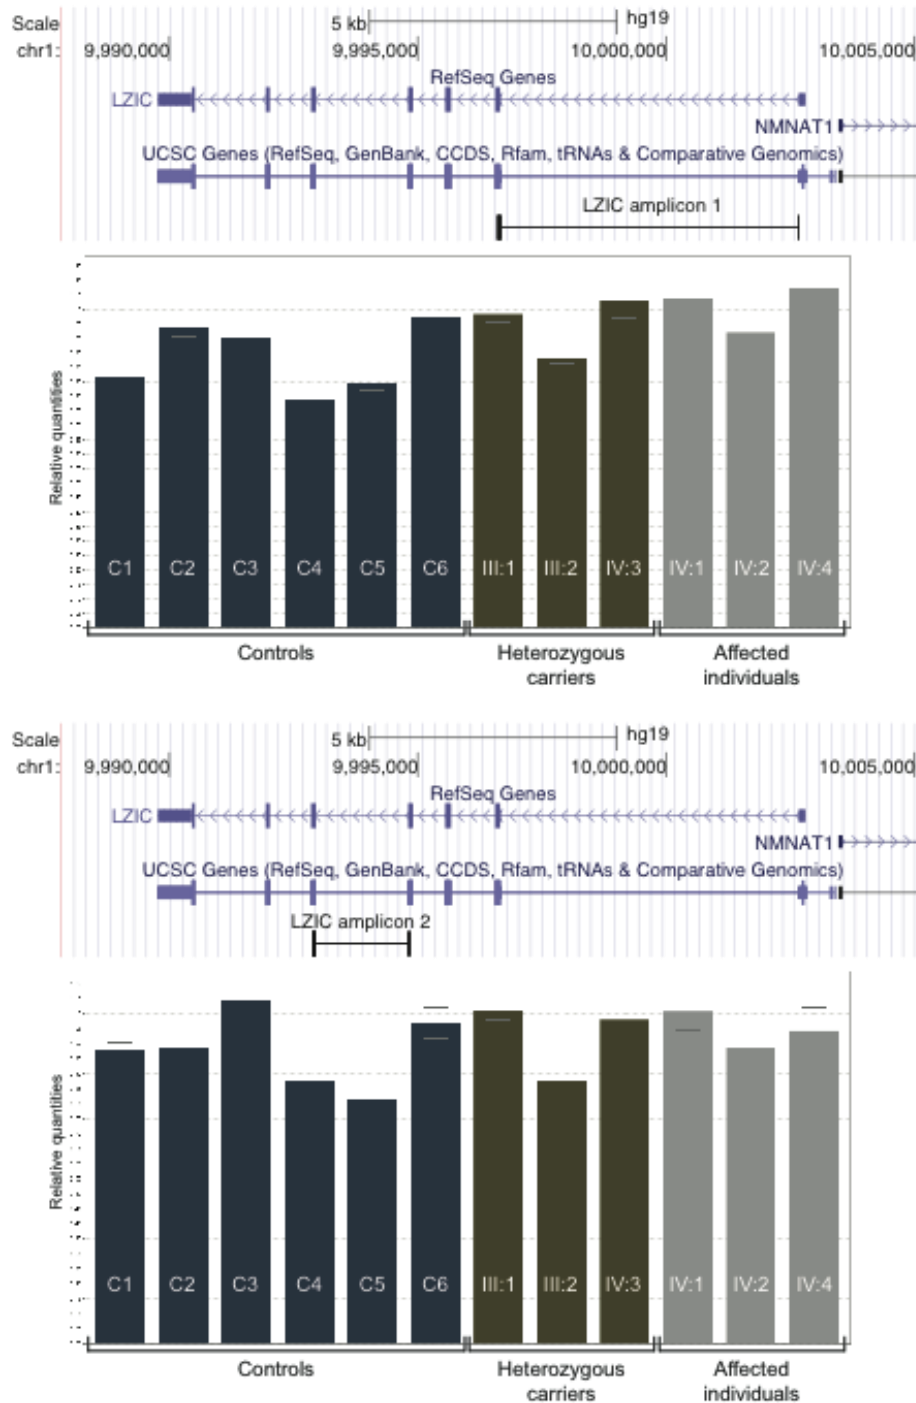

**Supp. Figure S4.** *LZIC* expression analysis in F1. qPCR analysis of two distinct intron-spanning amplicons for the *LZIC* gene, *LZIC* amplicon 1 and *LZIC* amplicon 2, revealed no difference in mRNA expression between the affected individuals of F1 (IV:1, IV:2, IV:4) in comparison with healthy control individuals (C1-C6). The upper panels contain UCSC Genome Browser views of the location of the amplicons, the lower panels show the results of the expression analysis.



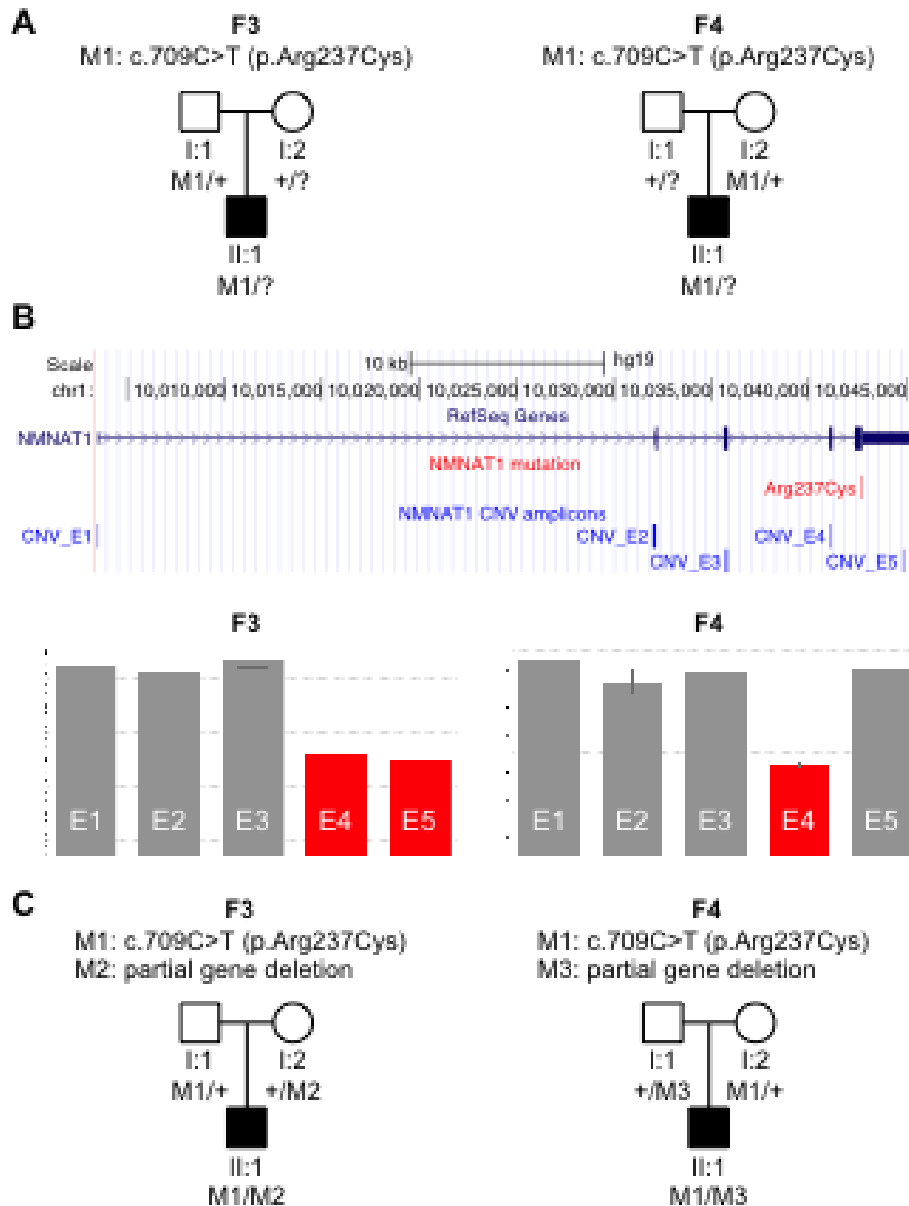

**Supp. Figure S6.** Identification of a heterozygous *NMNAT1* deletion in F3 and F4. **A)** Segregation analysis of the c.709C>T p.(Arg237Cys) mutation in F3 and F4 suggested hemizygosity for this mutation in the probands. **B)** Copy number variation (CNV) analysis using qPCR with one amplicon per exon showed a heterozygous deletion of exon 4 and 5 in the proband of F3 and a heterozygous deletion of exon 4 in the proband of F4. Based on these findings, the 3' end of the deletion in F4 should be located between the p.Arg237Cys mutation and the amplicon for the fifth exon, located in the 3'UTR. **C)** Segregation analysis of the c.709C>T p.(Arg237Cys) mutation (M1) and both partial deletions (M2 and M3), performed using qPCR analysis of one amplicon per exon. Abbreviations used: F: family; M: mutant allele, +: wild-type allele; ?: unknown allele; CNV: copy number variation; E: exon.



**Supp. Table S1. Homozygous regions >3 Mb and common between 2 affected siblings of F1**

| <b>Chr</b> | <b>Centromeric boundary (hg19)</b> | <b>Telomeric boundary (hg19)</b> | <b>Length (bp)</b> | <b>No of SNPs</b> | <b>No of genes</b> | <b>Healthy sibling</b> |
|------------|------------------------------------|----------------------------------|--------------------|-------------------|--------------------|------------------------|
| 4          | 42,748,945                         | 58,760,043                       | 16,011,098         | 1,155             | 109                | Partially hom          |
| 1          | 4,984,667                          | 19,332,076                       | 14,347,409         | 927               | 272                | Het                    |
| 1          | 240,611,614                        | 244,938,498                      | 4,326,884          | 441               | 52                 | Hom                    |
| 5          | 5,281,887                          | 8,527,844                        | 3,245,957          | 476               | 23                 | Het                    |

The presence of an identical homozygous haplotype in the healthy sibling for the third region (chr1) and a partially overlapping homozygous haplotype for the first region (chr4) resulted in exclusion and reduction of these regions, respectively. Abbreviations used: chr: chromosome; bp: base pairs; no: number; hom: homozygous; het: heterozygous.

**Supp. Table S2. Overview of all *NMNAT1* variants identified in the proband of F1**

| Intron/exon | cDNA (protein)     | Coverage | VAF | rs number (MAF)      | Splicing           |
|-------------|--------------------|----------|-----|----------------------|--------------------|
| Upstream    | c.-173G>C (p.=)    | 12       | 100 | rs2297843 (C=0.152)  | No effect          |
| E1 (5'UTR)  | c.-70A>T (p.?)     | 10x      | 100 | /                    | New donor site?    |
| I2          | c.115+354A>G (p.?) | 8x       | 100 | /                    | No effect          |
| I2          | c.116-177T>C (p.?) | 19x      | 100 | rs6657844 (T=0.037)  | No effect          |
| I3          | c.299+176G>A (p.?) | 25x      | 84  | rs12082318 (A=0.133) | No effect          |
| I4          | c.440-226C>T (p.?) | 18x      | 100 | rs11121509 (T=0.133) | New donor site?    |
| E5 (3'UTR)  | c.*16A>G (p.?)     | 43x      | 98  | rs12086725 (G=0.008) | No effect          |
| E5 (3'UTR)  | c.*699A>G (p.?)    | 6x       | 100 | rs6664208 (G=0.132)  | No effect          |
| E5 (3'UTR)  | c.*2393C>G (p.?)   | 62x      | 98  | rs4073852 (C=0.221)  | New acceptor site? |

The *NMNAT1* coding region showed a minimal coverage of 20x. The 5'UTR was covered at least 8x, whereas 82% of bases in the 3'UTR had a minimal coverage of at least 10x. *In silico* predictions for splicing were performed using the Alamut v2.3 interpretation software (default settings). For the c.\*16A>G variant, a minor allele frequency of 6.8% was reported in the sub-Saharan African population (Hapmap-YRI). Abbreviations used: I: intron; E: exon; UTR: untranslated region; VAF: variant allele frequency; MAF: minor allele frequency (dbSNP138); ND: no data.

**Supp. Table S3. *NMNAT1* coding mutations identified in this study**

| Family | <i>Allele 1</i> |          |             |                                                                                                        | <i>Allele 2</i> |          |             |                         |
|--------|-----------------|----------|-------------|--------------------------------------------------------------------------------------------------------|-----------------|----------|-------------|-------------------------|
|        | Exon            | cDNA     | Protein     | Reference                                                                                              | Exon/intron     | cDNA     | Protein     | Reference               |
| F5     | E5              | c.769G>A | p.Glu257Lys | (Chiang et al., 2012; Falk et al., 2012; Koenekoop et al., 2012; Perrault et al., 2012)<br>rs150726175 | E4              | c.364del | p.Arg122fs  | (Perrault et al., 2012) |
| F6     | E5              | c.769G>A | p.Glu257Lys | (Chiang et al., 2012; Falk et al., 2012; Koenekoop et al., 2012; Perrault et al., 2012)<br>rs150726175 | E5              | c.542A>G | p.Tyr181Cys | (Perrault et al., 2012) |
| F7     | E5              | c.769G>A | p.Glu257Lys | (Chiang et al., 2012; Falk et                                                                          | E5              | c.679C>T | p.Arg227Trp | novel                   |

| Family | Allele 1 |          |             |                                                                                | Allele 2    |      |         |           |
|--------|----------|----------|-------------|--------------------------------------------------------------------------------|-------------|------|---------|-----------|
|        | Exon     | cDNA     | Protein     | Reference                                                                      | Exon/intron | cDNA | Protein | Reference |
|        |          |          |             | al., 2012;<br>Koenekoop et al., 2012;<br>Perrault et al., 2012)<br>rs150726175 |             |      |         |           |
| F8     | E5       | c.562C>T | p.Arg188Trp | novel                                                                          | -           | -    | -       | -         |
| F9     | E2       | c.53A>G  | p.Asn18Ser  | (Siemiatkowska et al., 2014),<br>UV                                            | -           | -    | -       | -         |

Coding mutations in *NMNAT1* were identified in three families with LCA (F5, F6 and F7), all sharing the common c.769G>A p.(Glu257Lys) mutation (Chiang et al., 2012; Falk et al., 2012; Koenekoop et al., 2012; Perrault et al., 2012). The probands of F5 and F6 are compound heterozygous for known mutations: c.769G>A p.(Glu257Lys) as the first allele and c.364del p.(Arg122fs) (Perrault et al., 2012) and c.542A>G p.(Tyr181Cys) (Perrault et al., 2012) as the second allele, respectively. The proband of F7 is compound heterozygous for c.769G>A p.(Glu257Lys) and a novel missense mutation, c.679C>T p.(Arg227Trp), which affects a highly conserved amino acid and is predicted to affect protein function by SIFT, Align GVGD and PolyPhen-2 (Alamut v2.3 interpretation software, default settings used). The p.Glu257Lys mutation was also detected in a heterozygous state in 1/179 (0.6%) Belgian controls. Finally, two probands were found to carry a single heterozygous missense variant: c.562C>T p.(Arg188Trp) (F8) and c.53A>G p.(Asn18Ser) (F9). The Arg188 and Asn18 residues are highly and moderately conserved considering an alignment of sequences from 11 species, respectively. The p.Arg188Trp variant is predicted to affect protein function by PolyPhen-2, SIFT and Align GVGD. The p.Asn18Ser variant is predicted to be probably damaging by PolyPhen-2 but tolerated by SIFT and Align GVGD (Alamut v2.3 interpretation software, default settings used). In addition, this variant was recently described together with p.Asp158His in an LCA

patient (Siemiakowska et al., 2014). No phenotype data are available for the probands of F8 and F9. In both individuals, Sanger sequencing of the 5'UTR did not reveal a second mutation. In addition, qPCR analysis in F9 did not reveal a CNV. For F8, no DNA was available anymore to perform CNV analysis.

Abbreviations used: F: family; E: exon. Variants were designated as “unclassified variant (UV)” if no consensus was seen in all prediction programs used.

**Supp. Table S4. *In silico* evaluation of the *NMNAT1* 5'UTR variants**

| gDNA/cDNA level | Mechanism                             | Prediction tool                                       | Results                                                                                                                                                                                     |                                                                                                                                                                                        |
|-----------------|---------------------------------------|-------------------------------------------------------|---------------------------------------------------------------------------------------------------------------------------------------------------------------------------------------------|----------------------------------------------------------------------------------------------------------------------------------------------------------------------------------------|
|                 |                                       |                                                       | c.-70A>T (F1)                                                                                                                                                                               | c.-69C>T (F2)                                                                                                                                                                          |
| cDNA            | New uORF                              | NCBI ORF finder                                       | /                                                                                                                                                                                           | /                                                                                                                                                                                      |
| gDNA            | Transcription factor binding profiles | JASPAR 5.0 (core vertebrata) (Mathelier et al., 2014) | Loss of (score):<br>- <b>Mafb (5.9)</b><br>- <b>Sox6 (5.4)</b><br>- <b>Sox17 (7.9)</b><br>- <b>SOX10 (5.6)</b><br>Gain of (score):<br>- Meis1 (6.2)<br>- Pax2 (4.4)<br>- NFE2L1::MafG (5.1) | Loss of (score):<br>- THAP1 (5.4)<br>- <b>Mafb (5.9)</b><br>- <b>Sox6 (5.4)</b><br>- <b>Sox17 (7.9)</b><br>- <b>SOX10 (5.6)</b><br>- Pax2 (4.6)<br>Gain of (score):<br>- ZNF354C (4.8) |
| cDNA            | Functional RNA motifs and sites       | RegRNA 2.0 (Chang et al., 2013)                       | Gain of:<br>- LXRalpha:RXRalpha                                                                                                                                                             | Gain of:<br>- GATA2<br>- Musashi binding element                                                                                                                                       |

Differences between the mutations and the wild type sequence are indicated in bold. Default settings were used. Abbreviations used: uORF: upstream open reading frame; /: no difference with wild type.

**Supp. Table S5. G-quadruplexes predictions for the *NMNAT1* 5'UTR mutations**

|           | <b>gDNA/cDNA</b> | <b>Length</b> | <b>QGRS (Mathelier et al., 2014)</b>  | <b>G-Score</b> |
|-----------|------------------|---------------|---------------------------------------|----------------|
| Wild type | gDNA/cDNA        | 30            | <u>GGGCCGCTGGTGATCTCCGGTAGCACTCGG</u> | 19             |
| c.-69C>T  | gDNA/cDNA        | 30            | <u>GGGCCGCTGGTGATCTCCGGTAGCACTCGG</u> | 19             |
| c.-70A>T  | gDNA/cDNA        | 30            | <u>GGGCCGCTGGTGATCTCCGGTAGCACTCGG</u> | 19             |
| Wild type | gDNA             | 20            | <u>GGCGGACAGTGAGGGCGCGG</u>           | <b>15</b>      |
| c.-69C>T  | gDNA             | 20            | <u>GGCGGATAGTGAGGGCGCGG</u>           | <b>15</b>      |
| c.-70A>T  | gDNA             | 20            | <u>GGCGGTCAGTGAGGGCGCGG</u>           | <b>15</b>      |
| Wild type | cDNA             | 29            | <u>GGACAGTGAGGGCGCGACAACAAGGGAGG</u>  | <b>12</b>      |
| c.-69C>T  | cDNA             | 29            | <u>GGATAGTGAGGGCGCGACAACAAGGGAGG</u>  | <b>12</b>      |
| c.-70A>T  | cDNA             | 29            | <u>GGTCAGTGAGGGCGCGACAACAAGGGAGG</u>  | <b>12</b>      |

The location of both mutations in the G-quadruplexes is indicated in bold. Default settings were used.

**Supp. Table S6. Clinical findings of the probands of F3 and F4**

| <b>Individual</b> | <b>F3</b>  | <b>F4</b>  |
|-------------------|------------|------------|
| Origin            | Japan      | Japan      |
| Gender            | male       | male       |
| Age of diagnosis  | 3 months   | 3 months   |
| Nystagmus         | +          | +          |
| Eyepoking         | +          | +          |
| Enophthalmos      | +          | +          |
| ERG (age)         | NR (0)     | NR (0)     |
| BCVA (age)        | 0.03*(0)   | LP         |
| Refraction (age)  | 1.31** (0) | 7.32** (0) |
| VF (age)          | NE (4)     | NE (4)     |
| Color vision      | NE (4)     | NE (4)     |
| Night blindness   | +          | +          |
| Photophobia       | -          | -          |
| Fundus aspect     | CD         | CD         |
| Strabismus        | -          | -          |
| Cataract          | -          | -          |
| Keratoconus       | -          | -          |

Visual acuity was measured with Teller acuity cards. Refractometry was performed using a hand held autorefractor (Retinomax2, Nikon Corporation, Tokyo, Japan) after cycloplegia. Fundoscopy was performed after dilatation. Full field ERG was recorded from both eyes respectively after 20 minutes of dark adaptation before recording, under topical anesthesia with after instilling a single drop of 0.4% oxybuprocaine for the contact lens electrodes. Abbreviations used: ERG: electroretinogram; BCVA: best corrected visual acuity; VF: visual field; ODS: both eyes; NR: non recordable; \*: Teller acuity cards; LP: light perception; \*\*: average of ODS spherical equivalent; CD: circular degeneration of the macula.



**Supp. Table S7. Bioinformatic analysis of the *NMNAT1* deletion breakpoints**

| Family | Start (hg19) | End (hg19) | Size (bp) | Micro-homology (bp) | Proximal breakpoint region |                           |                                                    | Distal breakpoint region |                           |                                                    | Sequence identity between repetitive elements |
|--------|--------------|------------|-----------|---------------------|----------------------------|---------------------------|----------------------------------------------------|--------------------------|---------------------------|----------------------------------------------------|-----------------------------------------------|
|        |              |            |           |                     | Repetitive element         | Number of sequence motifs | Number of non-B DNA conformation prediction motifs | Repetitive element       | Number of sequence motifs | Number of non-B DNA conformation prediction motifs |                                               |
| F3     | 10,039,762   | 10,056,272 | 16,510    | 34                  | <i>AluY</i>                | 6                         | 1                                                  | <i>AluY</i>              | 17                        | 1                                                  | 92%                                           |
| F4     | 10,038,284   | 10,043,035 | 4,751     | 10                  | <i>AluSx</i>               | 6                         | 0                                                  | <i>AluSc</i>             | 12                        | 0                                                  | 88%                                           |

Non-B DNA conformations (with the exception of oligo(G)<sub>n</sub> tracts) should be located at both sides of the junction or overlapping the junction. Default settings were used. Abbreviations used: F: family; bp: base pairs.

**SUPP. REFERENCES**

- Chang, T. H., H. Y. Huang, J. B. Hsu, S. L. Weng, J. T. Horng and H. D. Huang. 2013. An enhanced computational platform for investigating the roles of regulatory RNA and for identifying functional RNA motifs. *BMC Bioinformatics* 14 Suppl 2:S4.
- Chiang, P. W., J. Wang, Y. Chen, Q. Fu, J. Zhong, X. Yi, R. Wu, H. Gan, Y. Shi, C. Barnett, D. Wheaton, M. Day, et al. 2012. Exome sequencing identifies NMNAT1 mutations as a cause of Leber congenital amaurosis. *Nat Genet* 44:972-974.
- Falk, M. J., Q. Zhang, E. Nakamaru-Ogiso, C. Kannabiran, Z. Fonseca-Kelly, C. Chakarova, I. Audo, D. S. Mackay, C. Zeitz, A. D. Borman, M. Staniszewska, R. Shukla, et al. 2012. NMNAT1 mutations cause Leber congenital amaurosis. *Nat Genet* 44:1040-1045.
- Koenekoop, R. K., H. Wang, J. Majewski, X. Wang, I. Lopez, H. Ren, Y. Chen, Y. Li, G. A. Fishman, M. Genead, J. Schwartzentruber, N. Solanki, et al. 2012. Mutations in NMNAT1 cause Leber congenital amaurosis and identify a new disease pathway for retinal degeneration. *Nat Genet* 44:1035-1039.
- Markham, N. R. and M. Zuker. 2008. UNAFold: software for nucleic acid folding and hybridization. *Methods Mol Biol* 453:3-31.
- Mathelier, A., X. Zhao, A. W. Zhang, F. Parcy, R. Worsley-Hunt, D. J. Arenillas, S. Buchman, C. Y. Chen, A. Chou, H. Ienasescu, J. Lim, C. Shyr, et al. 2014. JASPAR 2014: an extensively expanded and updated open-access database of transcription factor binding profiles. *Nucleic Acids Res* 42:D142-147.
- Perrault, I., S. Hanein, X. Zanlonghi, V. Serre, M. Nicouleau, S. Defoort-Delhemmes, N. Delphin, L. Fares-Taie, S. Gerber, O. Xerri, C. Edelson, A. Goldenberg, et al. 2012. Mutations in NMNAT1 cause Leber congenital amaurosis with early-onset severe macular and optic atrophy. *Nat Genet* 44:975-977.
- Siemiatkowska, A. M., L. I. van den Born, M. M. van Genderen, M. Bertelsen, D. Zobor, K. Rohrschneider, R. A. van Huet, S. Nurohmah, B. J. Klevering, S. Kohl, S. M. Faradz, T. Rosenberg, et al. 2014. Novel compound heterozygous NMNAT1 variants associated with Leber congenital amaurosis. *Mol Vis* 20:753-759.
